# Supplementary material
Source: Springer Nature journal article supplement (https://www.springermedizin.de/resource/supplementary/12958_2011_975_MOESM5_ESM.pdf/9566514)

***bERVE-A***

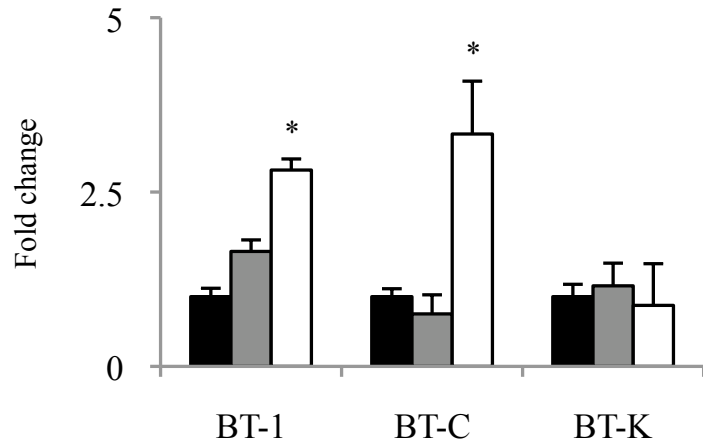

***bERVE-B***

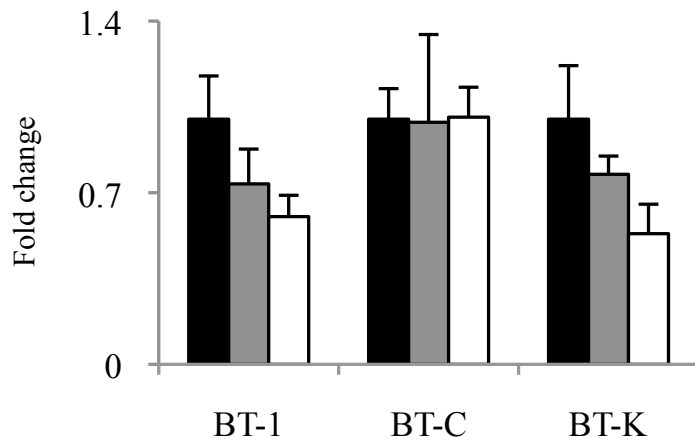

***BERV-K1 env***

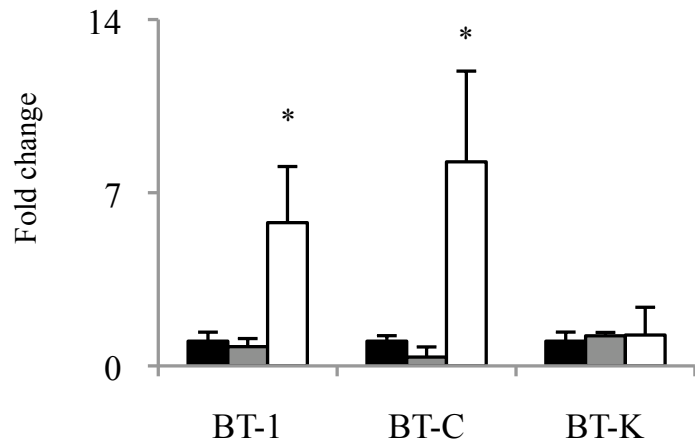

***BERV-K2 env***

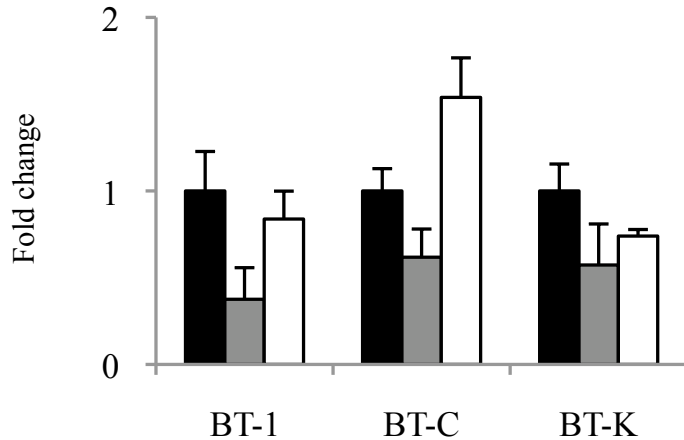

Supplement: MOESM5 [file 9566514]
